# Supplementary material
Source: publisher site journal article supplement (https://www.dovepress.com/article/316385)
Supplement: Supplementary file 1 [file get_supplementary_file.php]

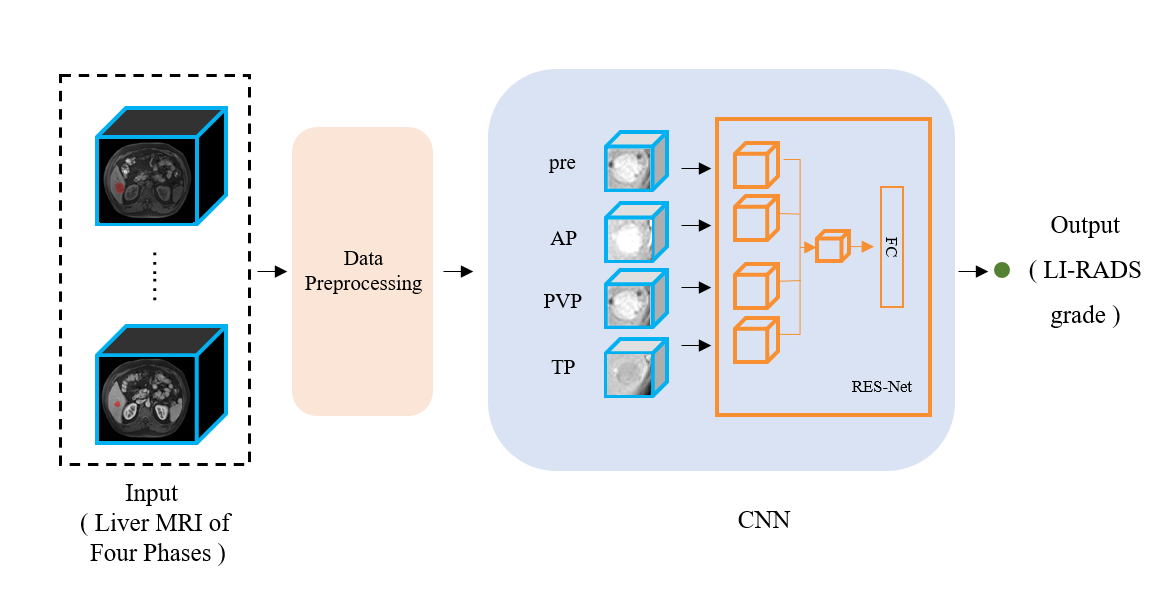


**Figure S1.** The black box LI-RADS grading system comprising two modules: the data preprocessing module and convolutional neural network (CNN) module that directly predicts the LI-RADS grade. (pre, pre-contrast; AP, arterial phase; PVP, portal venous phase; TP, transitional phase; FC, fully connected)

**
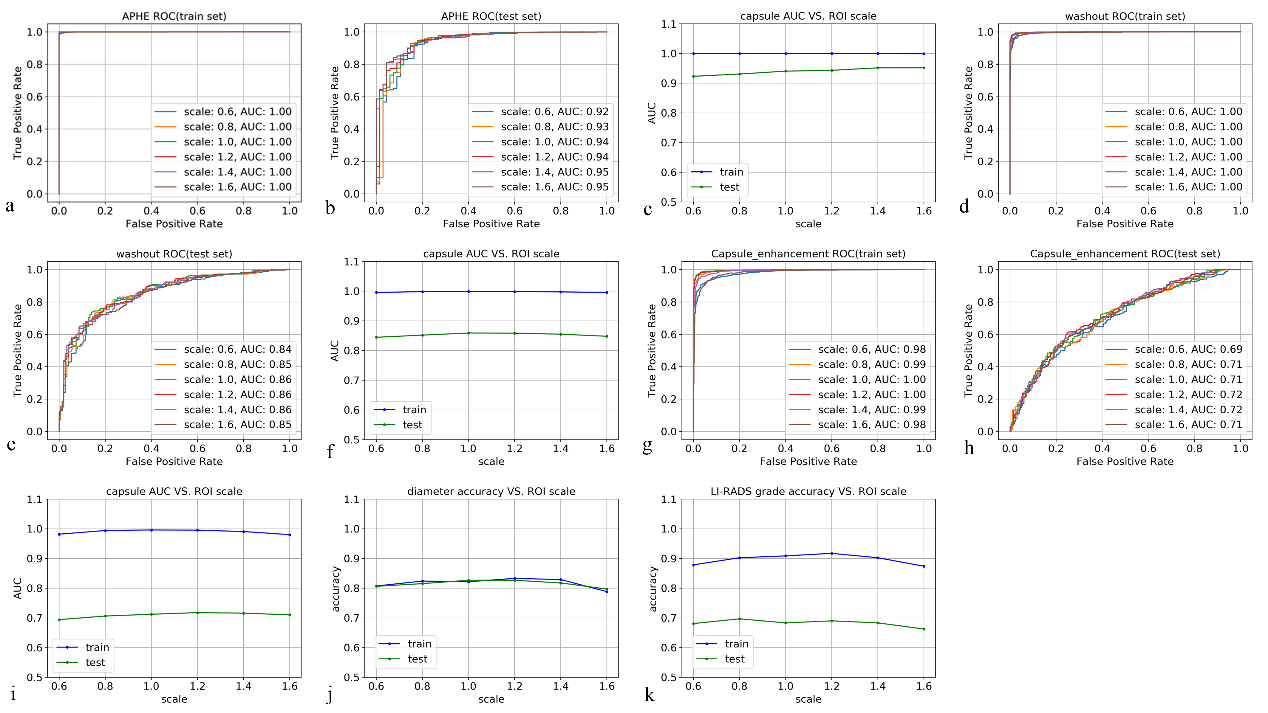
**

**Figure S2.** The robustness test of models against the variation of the region of interest (ROI) margin width, which was multiplied by a scale factor from 0.6 to 1.6 with a step size of 0.2. Figures (a) to (i) showed the performance changes of the three feature classification models with the scale factor; figure (j) corresponded to the performance variation of the lesion diameter interval classification; figure (k) presented the LI-RADS grading accuracy. (APHE, arterial phase hyper-enhancement; ROC, receiver operating characteristic; AUC, area under the curve)

**Table S1.** The confusion matrices on internal dataset across three diameter intervals.

| Training set | | Predicted | | |
| --- | --- | --- | --- | --- |
| <10 | [10 , 20 ) | ≥20 |
| Ground Truth | <10 | 166 (0.67) | 78 (0.31) | 4 (0.02) |
| [10 , 20 ) | 100 (0.12) | 659 (0.81) | 53 (0.07) |
| ≥20 | 0 (0.00) | 78 (0.11) | 618 (0.89) |

| Testing set | | Predicted | | |
| --- | --- | --- | --- | --- |
| <10 | [10 , 20 ) | ≥20 |
| Ground Truth | <10 | 42 (0.68) | 19 (0.31) | 1 (0.01) |
| [10 , 20 ) | 25 (0.12) | 166 (0.82) | 12 (0.06) |
| ≥20 | 0 (0.00) | 19 (0.11) | 155 (0.89) |

**Table S2.** The confusion matrices on internal dataset across three LI-RADS grades.

| Training Set | | Predicted | | |
| --- | --- | --- | --- | --- |
| LR-3 | LR-4 | LR-5 |
| Ground Truth | LR-3 | 355 (0.95) | 14 (0.04) | 3 (0.01) |
| LR-4 | 39 (0.10) | 310 (0.79) | 43 (0.11) |
| LR-5 | 3 (0.00) | 58 (0.06) | 931 (0.94) |

| Testing Set | | Predicted | | |
| --- | --- | --- | --- | --- |
| LR-3 | LR-4 | LR-5 |
| Ground Truth | LR-3 | 53 (0.57) | 27 (0.29) | 13 (0.14) |
| LR-4 | 21 (0.21) | 49 (0.50) | 28 (0.29) |
| LR-5 | 14 (0.06) | 36 (0.14) | 198 (0.80) |

**Table S3.** The confusion matrix on external dataset across three diameter intervals.

| Testing set | | Predicted | | |
| --- | --- | --- | --- | --- |
| <10 | [10 , 20 ) | ≥20 |
| Ground Truth | <10 | 5 (1.00) | 0 (0.00) | 0 (0.00) |
| [10 , 20 ) | 10 (0.14) | 55 (0.79) | 5 (0.07) |
| ≥20 | 0 (0.00) | 15 (0.05) | 265 (0.95) |

**Table S4.** The confusion matrix on external testing set across three LI-RADS grades.

| External Testing Set | | Predicted | | |
| --- | --- | --- | --- | --- |
| LR-3 | LR-4 | LR-5 |
| Ground Truth | LR-3 | 35 (0.7) | 14 (0.28) | 1(0.02) |
| LR-4 | 5 (0.08) | 29 (0.49) | 26 (0.43) |
| LR-5 | 21 (0.08) | 53 (0.22) | 171 (0.70) |

**Table S5.** The confusion matrices of end-to-end LI-RADS grading system on both internal and external dataset.

| Internal Training Set | | Predicted | | |
| --- | --- | --- | --- | --- |
| LR-3 | LR-4 | LR-5 |
| Ground Truth | LR-3 | 368 (0.99) | 4 (0.01) | 0 (0.00) |
| LR-4 | 0 (0.00) | 385 (0.98) | 7 (0.02) |
| LR-5 | 0 (0.00) | 4 (0.00) | 988 (1.00) |

| Internal Testing Set | | Predicted | | |
| --- | --- | --- | --- | --- |
| LR-3 | LR-4 | LR-5 |
| Ground Truth | LR-3 | 32 (0.35) | 43 (0.46) | 18 (0.19) |
| LR-4 | 24 (0.24) | 32 (0.33) | 42 (0.43) |
| LR-5 | 6 (0.02) | 62 (0.25) | 180 (0.73) |

| External Testing Set | | Predicted | | |
| --- | --- | --- | --- | --- |
| LR-3 | LR-4 | LR-5 |
| Ground Truth | LR-3 | 17 (0.34) | 29 (0.58) | 4 (0.08) |
| LR-4 | 5 (0.08) | 22 (0.37) | 33 (0.55) |
| LR-5 | 7 (0.03) | 99 (0.40) | 139 (0.57) |
